und dünnere, vorhanden sind. Die Lamellen sind in ziemlich regelmässigen Abständen von  $2\ \mu$  angeordnet; die dicksten sind ungefähr  $1.5\ \mu$  stark. Verbunden werden sie durch kräftige Radialfasern, die vom Zentrum des Otolithen zu seiner Peripherie ohne Unterbrechung durch die konzentrischen Lamellen laufen. Bei stärkerer Vergrösserung lösen sich die Lamellen in Reihen einzelner Punkte auf, da auch sie aus Fasern bestehen, die senkrecht zu den Radialfasern angeordnet sind.

In das so gebildete Maschennetz der organischen Grundsubstanz ist die anorganische Komponente des Otolithen in Form sehr schmaler, scharf zugespitzter Nadeln aus kohlen-saurem Kalk, die bei einer Länge von  $40\ \mu$  weniger als  $1\ \mu$  dick sind, eingelagert. Sie laufen in derselben Richtung wie die Radialfasern und gehen, ohne durch die konzentrischen Lamellen unterbrochen zu werden, durch diese hindurch.

In diesem Punkte weicht der Autor wesentlich von der Anschauung IMMERMANNS ab. Ebenso widerspricht er dessen Meinung, wonach die für die Altersbestimmung benutzten transparenten und opaken Jahresringe durch den anorganischen Anteil des Otolithen, die Kalknadeln, hervorgerufen werden. Er weist nach, dass, wenn man die Versuche IMMERMANNS wiederholt und die Otolithen des Seehechts entkalkt, oder sie mit starker Natronlauge behandelt, oder sie ausglüht, das Kalkskelett die Jahresringe nicht mehr zeigt, wohl aber die organische Fasersubstanz. Er zeigt, dass die dünnen und dicken Lamellen in Gruppen angeordnet sind, und dass, wenn eine Region dünner Lamellen von einer Folge dicker Lamellen überlagert wird, eine Einsenkung entsteht, sodass schliesslich Furchen auf der Oberfläche des Otolithen den transparenten Zonen korrespondieren.

Die Ergebnisse der sorgfältigen Untersuchungen HICKLINGS können durchaus acceptiert werden. Doch sei zur Vorsicht gemahnt, die Befunde beim Seehecht ohne weiteres auf die Otolithen anderer Fische zu übertragen. Der Autor macht darauf aufmerksam, dass lange Zeit getrocknete Seehechtotolithen nie wieder vollständig aufgehellt werden können, wohl aber die der Scholle. Wenn er diesen Umstand mit der geringen Dicke des Schollentolithen erklärt, so dürfte das nicht ganz zutreffen, da die grossen und dicken Otolithen anderer Fische nach dem Trocknen in Flüssigkeit ebenfalls wieder völlig transparent werden. Vielmehr kann das verschiedene Verhalten der Otolithen beider Fische als Hinweis auf bedeutungsvolle Unterschiede ihres inneren Baues gedeutet werden. Es wäre daher zu begrüssen, entschlösse sich der Autor, seine Untersuchungen auch auf die Otolithen anderer wichtiger Nutzfische, wie Scholle, Hering und Schellfisch, auszudehnen.

H. L.

**A. C. Johansen.** The Sprat (*Clupea sprattus* L.) in the Limfjord. Rep. Dan. Biol. Stat. Vol. XXXVI, pp. 57—67. Copenhagen, 1930.

In past years sprats were not separated from young herring in the Limfjord catches, but recently this has been done, as the price obtained for sprats is much higher than that for herring. Statistics have been collected from 1919 onwards and show a catch of sprats varying from 26 tons in 1921 to the considerable figure of 819 tons in 1927 within this restricted and landlocked area, the most productive region of which appears to be the central portion, while the eastern end is of no importance. The years 1925

—1929 were the most productive, but no connection between abundance of sprats and of herring can be detected. 70 % of these sprats are exported to Germany and some to Norway and Sweden; the rest are consumed in Denmark, although no canning industry exists.

The fishing season lasts from October to May and is most intense from November to February, but sprats are present in the Limfjord even when there is no fishing (June—September). When the water becomes cold the sprats migrate to the deeper, warmer parts of the fjord. They shoal together for spawning in spring, but it is not clear from the text whether at other times the sprats are scattered or form feeding shoals. Spawning occurs from April to July and sprat eggs are commonest in the central part of the fjord where the fishing also is most productive, the maximum number observed (per sq. m. of surface) being 291 (1st—6th May 1930), most of which were in the germinal disc stage. Ripe and nearly spent sprats were found at Hvalpsund on  $\frac{23}{6}$  30.

Four samples of fish, taken in June, August and September 1930 and one in January 1916 (a total of some 560 fish), were measured and in some cases scaled for age-determination. The 0-group appears to range from 2 to 8 cm. in length with a mode at about 3 cm., while the I-group ranges from 7.5 to 11 or 12 cm. with a mode at about 9 cm., and the II-group varies from 9.5 to 12 cm. with a mode at about 11 cm.

Some fish had no trace of a winter ring when 7.5—8 cm. in length (August 1930) and even when 10—11 cm. long (January 1916), probably because they had failed to form scales before the onset of their first winter. Where the spawning extends beyond July this may cause serious errors in age-determination, which is additionally hindered by ambiguous and possibly false (secondary) rings.

JOHANSEN concludes that the Limfjord sprat is a special race as its mean vertebral number (46.95—47.02) is considerably lower than the lowest figure recorded by BJERKAN in North Sea and Skagerak fish (i. e. 47.625 at Lowestoft).

This paper gives a good brief account of an interesting sprat population in enclosed waters, which, if it could be more thoroughly investigated, might well provide clues to the behaviour of sprats in the open sea, particularly at that time (March to October) when they desert the coast as ripe fish and are caught but rarely by fishing vessels.

J. A. R.

**R. E. Savage.** The Relation between the Feeding of the Herring off the East Coast of England and the Plankton of the Surrounding Waters. Ministry of Agriculture and Fisheries. Fishery Investigations, Series II. Vol. XII. No. 3, 1931. London 1931.

The present report is a comprehensive work on the relation between the feeding of the herring and the plankton off the east coast of England and is — together with A. C. HARDY's paper (1924) — an important contribution to the knowledge of the food of the herring in the western part of the North Sea.

Altogether 13,923 stomachs of herring and 956 plankton samples were collected and examined. The large collection of stomachs was obtained from the Lowestoft spring and autumn fishery, the Shields summer fishery and
